# Supplementary material for: Low T3 State Is Correlated with Cardiac Mitochondrial Impairments after Ischemia Reperfusion Injury: Evidence from a Proteomic Approach
Source: PubMed Central journal article supplement (PMC4661832; doi:10.3390/ijms161125973), 2015-11-06
Supplement: ijms-16-25973-s001.pdf [file ijms-16-25973-s001.pdf]

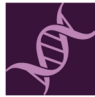

## Supplementary Information

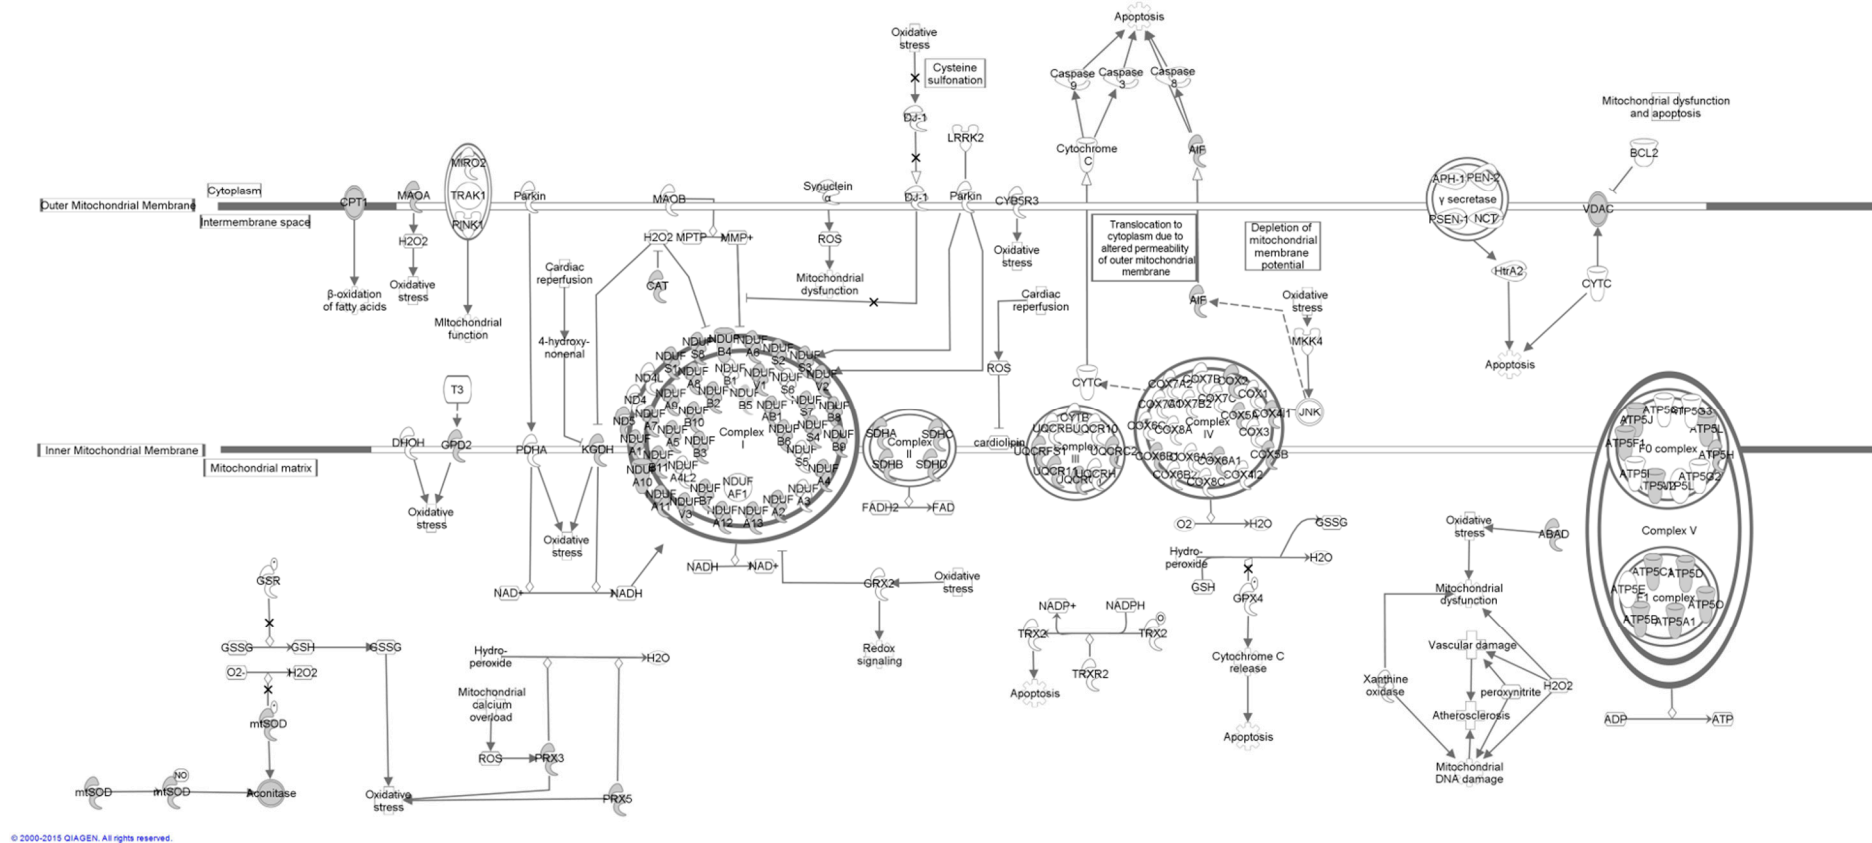

**Figure S1.** IPA representation of mitochondrial pathways. The complete list of identified proteins was submitted to IPA. Almost all the mitochondrial functional proteins were mapped (shown in grey).

**Table S1.** Differentially expressed proteins involved in cell death and mitochondrial quality control in response to stress.

| Accession Number                         | Gene Name       | Protein Name                                                  | Function, Process                                                                                 | IR-LT3S (FC) | IR-NT3 (FC) |
|------------------------------------------|-----------------|---------------------------------------------------------------|---------------------------------------------------------------------------------------------------|--------------|-------------|
| <i>Mitochondria-mediated cell death:</i> |                 |                                                               |                                                                                                   |              |             |
| G3V741                                   | <i>Slc25a3</i>  | Phosphate carrier protein                                     | Mitochondria permeability transition (cell death)                                                 | NS           | -2.2 *      |
| Q9WVJ6                                   | <i>Tgm2</i>     | Protein Tgm2                                                  | Clearance of damaged mitochondria                                                                 | 7.0          | 39 *        |
| Q9Z2L0                                   | <i>Vdac1</i>    | Voltage-dependent anion-selective channel protein 1           | Apoptosis, necrosis                                                                               | 3.4          | NS *        |
| P81155                                   | <i>Vdac2</i>    | Voltage-dependent anion-selective channel protein 2           | Apoptosis, necrosis                                                                               | 3.4          | 1.80        |
| Q9R1Z0                                   | <i>Vdac3</i>    | Voltage-dependent anion-selective channel protein 3           | Apoptosis, necrosis                                                                               | 3.5          | 2.05        |
| <i>Mitochondria quality control:</i>     |                 |                                                               |                                                                                                   |              |             |
| G3V913                                   | <i>Hspb1</i>    | Heat shock 27 kDa protein 1                                   | Chaperone, negative regulation of oxidative stress                                                | 42           | 67 *        |
| P63018                                   | <i>Hspa8</i>    | Heat shock cognate 71 kDa                                     | Chaperone-mediated protein folding                                                                | NS           | 20 *        |
| P97541                                   | <i>Hspb6</i>    | Heat shock protein $\beta$ -6                                 | Chaperone, protein homodimerization                                                               | NS           | 3.1 *       |
| P34058                                   | <i>Hsp90ab1</i> | Heat shock protein HSP 90- $\beta$                            | Chaperone, maturation, structural maintenance and proper regulation of target proteins            | 7.5          | 24 *        |
| P63039                                   | <i>Hspd1</i>    | Heat shock protein 60 kDa                                     | Mitochondrial protein import and macromolecular assembly                                          | 4.4          | 4.1         |
| P97576                                   | <i>Grpel1</i>   | GrpE protein homolog 1                                        | Proteins translocation from the inner membrane into the mitochondrial matrix                      | 4.9          | 7.3         |
| P23928                                   | <i>Cryab</i>    | $\alpha$ -crystallin B chain                                  | Chaperone-like activity, preventing aggregation of various proteins under stress conditions       | 14           | 27 *        |
| Q5XIM0                                   | <i>Bcs1l</i>    | BCS1-like (Yeast)                                             | Chaperone-like protein essential for mitochondrial complex assembly                               | 4.2          | 5.3         |
| Q5BJQ0                                   | <i>Adck3</i>    | Chaperone activity of bc1 complex-like                        | Chaperone-like. Proper conformation and functioning of protein complexes in the respiratory chain | 5.6          | 6.2         |
| D4AC73                                   | <i>Chchd7</i>   | Protein Chchd7                                                | Assembly of mitochondrial respiratory complex COX23<br>Cytochrome C Oxidase Assembly Homolog      | 7.3          | 1.4 *       |
| P85834                                   | <i>Tufm</i>     | Elongation factor Tu                                          | Mitochondrial protein biosynthesis                                                                | 5.1          | 3.7 *       |
| Q68FT1                                   | <i>Coq9</i>     | Ubiquinone biosynthesis protein                               | Cofactor biosynthesis                                                                             | 2.4          | 8.0 *       |
| P62076                                   | <i>Timm13</i>   | Mitochondrial import inner membrane translocase subunit Tim13 | Chaperone-like, protein folding and guiding through the mitochondrial intermembrane space         | NS           | 1.3 *       |
| P62909                                   | <i>Rps3</i>     | 40S ribosomal protein S3                                      | Repair of damaged DNA                                                                             | 8.7          | 28 *        |
| G3V8V6                                   | <i>MacroD1</i>  | O-acetyl-ADP-ribose deacetylase MACROD1                       | Cellular response to DNA damage stimulus                                                          | 7.3          | 15 *        |
| P31044                                   | <i>Pebp1</i>    | Phosphatidylethanolamine-binding protein 1                    | Serine protease inhibitor, response to oxidative stress and wounding                              | 3.7          | 14 *        |
| F1LM33                                   | <i>Lrpprc</i>   | Leucine-rich PPR                                              | Translation or stability of mitochondrially encoded cytochrome c oxidase subunits                 | 2.9          | 4.4         |
| P13437                                   | <i>Acaa2</i>    | 3-ketoacyl-CoA thiolase                                       | Abolishes mitochondrial damage and BNIP3-mediated apoptosis                                       | 13           | 15          |

**Table S1.** Cont.

| Accession Number            | Gene Name      | Protein Name                                 | Function, Process                                               | IR-LT3S (FC) | IR-NT3 (FC) |
|-----------------------------|----------------|----------------------------------------------|-----------------------------------------------------------------|--------------|-------------|
| <i>Antioxidant defence:</i> |                |                                              |                                                                 |              |             |
| G3V7J0                      | <i>Aldh6a1</i> | Aldehyde dehydrogenase family 6, isoform CRA | Aldehyde clearance, prevents aldehyde mediated oxidative stress | 4.2          | 10 *        |
| F1LN88                      | <i>Aldh2</i>   | Aldehyde dehydrogenase                       | Aldehyde clearance, prevents aldehyde mediated oxidative stress | NS           | 9.6 *       |
| P35704                      | <i>Prdx2</i>   | Peroxiredoxin-2                              | Antioxidant                                                     | NS           | 19 *        |
| Q9R063                      | <i>Prdx5</i>   | Peroxiredoxin-5                              | Antioxidant                                                     | NS           | 39 *        |
| P07632                      | <i>Sod1</i>    | Superoxide dismutase [Cu-Zn]                 | Antioxidant                                                     | NS           | 8.8 *       |
| P07895                      | <i>Sod2</i>    | Superoxide dismutase [Mn]                    | Antioxidant                                                     | NS           | 12 *        |

Comparison among groups was performed as described in statistical analysis. FC = fold change with respect to sham group; NS = not significantly different from sham group; \* *p* vs. IR-LT3S < 0.017.

**Table S2.** Differentially expressed proteins involved in electron transport and oxidative phosphorylation.

| Accession Number | Gene Name      | Protein Name                             | Function, Process              | IR-LT3S (FC) | IR-NT3 (FC) |
|------------------|----------------|------------------------------------------|--------------------------------|--------------|-------------|
| P11608           | <i>Mt-atp8</i> | ATP synthase protein 8                   | ATP synthesis complex V        | -55          | -40         |
| P15999           | <i>Atp5a1</i>  | ATP synthase subunit $\alpha$            | ATP synthesis complex V        | -4.5         | -5.2        |
| G3V6D3           | <i>Atp5b</i>   | ATP synthase subunit $\beta$             | ATP synthesis complex V        | -3.0         | -2.7        |
| P31399           | <i>Atp5h</i>   | ATP synthase subunit d                   | ATP synthesis complex V        | -10          | -15         |
| G3V7Y3           | <i>Atp5d</i>   | ATP synthase subunit $\delta$            | ATP synthesis complex V        | -6.4         | -7.7        |
| P29419           | <i>Atp5i</i>   | ATP synthase subunit e                   | ATP synthesis complex V        | -9.2         | -13         |
| F7FFJ9           | <i>Atp5c1</i>  | ATP synthase subunit $\gamma$            | ATP synthesis complex V        | -1.92        | -2.5        |
| Q06647           | <i>Atp5o</i>   | ATP synthase subunit O                   | ATP synthesis complex V        | -3.6         | -3.3        |
| P21571           | <i>Atp5j</i>   | ATP synthase-coupling factor 6           | ATP synthesis complex V        | -4.4         | -16         |
| Q68FY0           | <i>Uqcrc1</i>  | Cytochrome b-c1 complex subunit 1        | Electron transport complex III | -3.1         | -4.7 *      |
| P32551           | <i>Uqcrc2</i>  | Cytochrome b-c1 complex subunit 2        | Electron transport complex III | -2.0         | -2.4        |
| Q5M9I5           | <i>Uqcrh</i>   | Cytochrome b-c1 complex subunit 6        | Electron transport complex III | 1.30         | -15 *       |
| Q7TQ16           | <i>Uqcrq</i>   | Cytochrome b-c1 complex subunit 8        | Electron transport complex III | -4.3         | -3.9        |
| P20788           | <i>Uqcrrf1</i> | Cytochrome b-c1 complex subunit Rieske   | Electron transport complex III | -5.6         | -6.0        |
| Q8SEZ5           | <i>Mt-co2</i>  | Cytochrome c oxidase subunit 2           | Electron transport complex IV  | NS           | -3.6 *      |
| P10888           | <i>Cox4i1</i>  | Cytochrome c oxidase subunit 4 isoform 1 | Electron transport complex IV  | -1.7         | -6.2 *      |
| P11240           | <i>Cox5a</i>   | Cytochrome c oxidase subunit 5A          | Electron transport complex IV  | NS           | -3.4 *      |

Table S2. Cont.

| Accession Number | Gene Name        | Protein Name                                                     | Function, Process             | IR-LT3S (FC) | IR-NT3 (FC) |
|------------------|------------------|------------------------------------------------------------------|-------------------------------|--------------|-------------|
| D3ZD09           | <i>Cox6b1</i>    | Cytochrome c oxidase subunit 6B1                                 | Electron transport complex IV | -3.6         | -5.6        |
| P11951           | <i>Cox6c2</i>    | Cytochrome c oxidase subunit 6C-2                                | Electron transport complex IV | -3.3         | -8.8 *      |
| P35171           | <i>Cox7a2</i>    | Cytochrome c oxidase subunit 7A2                                 | Electron transport complex IV | -4.0         | -4.4        |
| D3ZYX8           | <i>Cox7a2l</i>   | Cytochrome c oxidase subunit VIIa polypeptide 2 like             | Electron transport complex IV | -27          | -12.5       |
| D3ZFK8           | <i>Cyc1</i>      | Cytochrome c-1 (Predicted), isoform CRA_b                        | Electron carrier protein      | NS           | -3.8 *      |
| Q66HF3           | <i>Etfdh</i>     | Electron transfer flavoprotein-ubiquinone oxidoreductase         | Electron carrier protein      | NS           | -2.3 *      |
| Q5RK08           | <i>Gbas</i>      | Glioblastoma amplified sequence                                  | Oxidative phosphorylation     | 9.00         | 6.5 *       |
| F1LXA0           | <i>Ndufa12</i>   | NADH dehydrogenase (Ubiquinone) 1 $\alpha$ subcomplex, 12        | Electron transport complex I  | -2.4         | -2.7        |
| B2RYS8           | <i>Ndufb8</i>    | NADH dehydrogenase (Ubiquinone) 1 $\beta$ subcomplex 8           | Electron transport complex I  | 1.24         | -5.4 *      |
| D4A565           | <i>Ndufb5</i>    | NADH dehydrogenase (Ubiquinone) 1 $\beta$ subcomplex, 5          | Electron transport complex I  | NS           | -2.1 *      |
| D3ZZ21           | <i>Ndufb6</i>    | NADH dehydrogenase (Ubiquinone) 1 $\beta$ subcomplex, 6          | Electron transport complex I  | NS           | -4.7 *      |
| D3ZLT1           | <i>Ndufb7</i>    | NADH dehydrogenase (Ubiquinone) 1 $\beta$ subcomplex, 7          | Electron transport complex I  | -1.71        | -1.29       |
| B2RYW3           | <i>Ndufb9</i>    | NADH dehydrogenase (Ubiquinone) 1 $\beta$ subcomplex, 9          | Electron transport complex I  | NS           | -6.2 *      |
| D3ZG43           | <i>Ndufs3</i>    | NADH dehydrogenase (Ubiquinone) Fe-S protein 3                   | Electron transport complex I  | 1.73         | -2.2        |
| Q5RJN0           | <i>Ndufs7</i>    | NADH dehydrogenase (Ubiquinone) Fe-S protein 7                   | Electron transport complex I  | 2.07         | NS *        |
| B0BNE6           | <i>Ndufs8</i>    | NADH dehydrogenase (Ubiquinone) Fe-S protein 8                   | Electron transport complex I  | 4.0          | NS *        |
| Q5XIH3           | <i>Ndufv1</i>    | NADH dehydrogenase (Ubiquinone) flavoprotein 1                   | Electron transport complex I  | 1.43         | -2.2 *      |
| Q561S0           | <i>Ndufa10</i>   | NADH dehydrogenase (Ubiquinone) 1 $\alpha$ subcomplex subunit 10 | Electron transport complex I  | -3.1         | -1.8 *      |
| D3ZS58           | <i>Ndufa2</i>    | NADH dehydrogenase (Ubiquinone) 1 $\alpha$ subcomplex subunit 2  | Electron transport complex I  | 1.37         | -4.2 *      |
| Q63362           | <i>Ndufa5</i>    | NADH dehydrogenase (Ubiquinone) 1 $\alpha$ subcomplex subunit 5  | Electron transport complex I  | 2.7          | -2.7 *      |
| Q5BK63           | <i>Ndufa9</i>    | NADH dehydrogenase (Ubiquinone) 1 $\alpha$ subcomplex subunit 9  | Electron transport complex I  | 2.8          | NS *        |
| Q5PQZ9           | <i>Ndufc2</i>    | NADH dehydrogenase (Ubiquinone) 1 subunit C2                     | Electron transport complex I  | -25          | -29         |
| P19234           | <i>Ndufv2</i>    | NADH dehydrogenase (Ubiquinone) flavoprotein 2                   | Electron transport complex I  | NS           | -3.1 *      |
| Q641Y2           | <i>Ndufs2</i>    | NADH dehydrogenase (Ubiquinone) iron-sulfur protein 2            | Electron transport complex I  | 1.97         | -1.4 *      |
| Q5XIF3           | <i>Ndufs4</i>    | NADH dehydrogenase (Ubiquinone) iron-sulfur protein 4            | Electron transport complex I  | 3.30         | NS *        |
| Q66HF1           | <i>Ndufs1</i>    | NADH-ubiquinone oxidoreductase 75 kDa subunit                    | Electron transport complex I  | 1.44         | -3.1        |
| Q8SEZ0           | <i>Mt-nd5</i>    | NADH-ubiquinone oxidoreductase chain 5                           | Electron transport complex I  | -3.0         | -5.4        |
| A9UMV9           | <i>Ndufa7</i>    | Ndufa7 protein                                                   | Electron transport complex I  | -7.9         | -5.2        |
| D4A5L9           | <i>LOC679794</i> | Protein LOC679794                                                | Electron carrier protein      | -11          | NS *        |
| D4A4P3           | <i>Ndufa3</i>    | Protein LOC100361144                                             | Electron carrier protein      | 2.14         | -6.2 *      |
| F1LPG5           | <i>Ndufa4</i>    | Protein LOC688963                                                | Electron carrier protein      | -2.4         | -2.4        |

Comparison among groups was performed as described in statistical analysis. FC = fold change with respect to sham group; NS = not significantly different from sham group; \*  $p$  vs. IR-LT3S < 0.017.

**Table S3.** Differentially expressed proteins involved in pyruvate metabolism and tricarboxylic acid cycle.

| Accession Number | Gene Name     | Protein Name                                                    | Function, Process                              | IR-LT3S (FC) | IR-NT3 (FC) |
|------------------|---------------|-----------------------------------------------------------------|------------------------------------------------|--------------|-------------|
| P00507           | <i>Got2</i>   | Aspartate aminotransferase                                      | Pre TCA, anaplerotic reaction                  | NS           | 10 *        |
| P38718           | <i>Mpc2</i>   | Mitochondrial pyruvate carrier 2                                | Mitochondrial pyruvate transport (pre TCA)     | 16           | 25          |
| D4A5G8           | <i>Pdha11</i> | Protein Pdha1/1                                                 | Conversion of pyruvate to acetyl-CoA (pre TCA) | 2.8          | 5.0 *       |
| P49432           | <i>Pdhb</i>   | Pyruvate dehydrogenase E1 component subunit $\beta$             | Conversion of pyruvate to acetyl-CoA (pre TCA) | 1.7          | 3.6         |
| F1MA54           | <i>Pdk1</i>   | Pyruvate dehydrogenase (acetyl-transferring) kinase isozyme 1   | Conversion of pyruvate to acetyl-CoA (pre TCA) | 11           | 15 *        |
| Q64536           | <i>Pdk2</i>   | Pyruvate dehydrogenase (acetyl-transferring) kinase isozyme 2   | Conversion of pyruvate to acetyl-CoA (pre TCA) | 6.7          | 13 *        |
| Q8VHF5           | <i>Cs</i>     | Citrate synthase                                                | TCA                                            | NS           | 7.2 *       |
| Q9ER34           | <i>Aco2</i>   | Aconitate hydratase                                             | TCA                                            | 2.0          | 4.9 *       |
| F1LNF7           | <i>Idh3a</i>  | Isocitrate dehydrogenase (NAD) subunit $\alpha$                 | TCA                                            | 4.2          | 4.5         |
| Q68FX0           | <i>Idh3B</i>  | Isocitrate dehydrogenase (NAD) subunit $\beta$                  | TCA                                            | 5.1          | 7.0         |
| P56574           | <i>Idh2</i>   | Isocitrate dehydrogenase (NADP)                                 | TCA                                            | 5.8          | 10 *        |
| Q5XIJ3           | <i>Idh3g</i>  | Isocitrate dehydrogenase 3 (NAD), $\gamma$                      | TCA                                            | 10           | 15          |
| Q5XI78           | <i>Ogdh</i>   | 2-oxoglutarate dehydrogenase                                    | TCA                                            | N.S          | 4.0 *       |
| G3V6P2           | <i>Dlst</i>   | Dihydrolipoamide S-succinyltransferase                          | TCA, (E2 component of 2-oxo-glutarate complex) | NS           | 2.3 *       |
| Q6P6R2           | <i>Dld</i>    | Dihydrolipoyl dehydrogenase                                     | TCA, (E3 component of 2-oxo-glutarate complex) | -1.8         | 4.7 *       |
| F1LM47           | <i>Sucla2</i> | Protein Sucla2                                                  | TCA (succinyl-CoA synthetase)                  | 12           | 18 *        |
| P13086           | <i>Suclg1</i> | Succinyl-CoA synthetase (ADP/GDP-forming) subunit $\alpha$      | TCA                                            | 3.1          | 5.3 *       |
| Q641Z9           | <i>Sdhc</i>   | Succinate dehydrogenase complex, subunit c, integral membrane   | TCA (succinate dehydrogenase activity)         | 1.6          | 1.7         |
| Q6PCT8           | <i>Sdhd</i>   | Succinate dehydrogenase (ubiquinone) cytochrome b small subunit | TCA                                            | 3.0          | 3.3         |
| Q920L2           | <i>Sdha</i>   | Succinate dehydrogenase (ubiquinone) flavoprotein subunit       | TCA                                            | 1.4          | -1.4 *      |
| P21913           | <i>Sdhb</i>   | Succinate dehydrogenase (ubiquinone) iron-sulfur subunit        | TCA                                            | 1.4          | NS *        |
| Q5M964           | <i>Fh</i>     | Fumarate hydratase 1                                            | TCA                                            | NS           | 3.4 *       |
| P04636           | <i>Mdh2</i>   | Malate dehydrogenase                                            | TCA                                            | -7.7         | NS *        |

TCA = tricarboxylic acid cycle. Comparison among groups was performed as described in statistical analysis. FC = fold change with respect to sham group; NS = not significantly different from sham group; \*  $p$  vs. IR-LT3S < 0.017.

**Table S4.** Differentially expressed proteins involved in fatty acid transport, biosynthesis and oxidation.

| Accession Number | Gene Name      | Protein Name                                                                            | Function, Process                                                      | IR-LT3S (FC) | IR-NT3 (FC) |
|------------------|----------------|-----------------------------------------------------------------------------------------|------------------------------------------------------------------------|--------------|-------------|
| G3V734           | <i>Decr1</i>   | 2,4-dienoyl CoA reductase 1                                                             | Auxiliary enzyme of $\beta$ oxidation                                  | 2.6          | 13 *        |
| D3ZA93           | <i>Acot13</i>  | Protein Acot13                                                                          | Regulate intracellular levels of acyl-CoAs, free fatty acids and CoASH | 6.1          | 10 *        |
| G3V796           | <i>Acadm</i>   | Acetyl-Coenzyme A dehydrogenase, medium chain                                           | Fatty acid $\beta$ oxidation                                           | 3.5          | 5.9 *       |
| Q6IMX3           | <i>Acads</i>   | Acetyl-Coenzyme A dehydrogenase, short chain                                            | Fatty acid $\beta$ oxidation                                           | 4.8          | 6.1 *       |
| D3ZF13           | <i>Ndufab1</i> | Acyl carrier protein                                                                    | Fatty acid biosynthesis                                                | 1.4          | -3.4 *      |
| Q499N5           | <i>Acsf2</i>   | Acyl-CoA synthetase family member 2                                                     | Fatty acid metabolism                                                  | 7.3          | 15 *        |
| Q6IMX8           | <i>Acot2</i>   | Acyl-CoA thioesterase 2                                                                 | Increases the utilization of fatty acid substrate                      | NS           | 7.1 *       |
| Q5M9H2           | <i>Acadol</i>  | Acyl-Coenzyme A dehydrogenase, very long chain                                          | Fatty acid $\beta$ oxidation                                           | 4.0          | 2.4         |
| Q63704           | <i>Cpt1b</i>   | Carnitine <i>O</i> -palmitoyltransferase 1                                              | Fatty acid $\beta$ oxidation                                           | 2.9          | 1.6 *       |
| P18886           | <i>Cpt2</i>    | Carnitine <i>O</i> -palmitoyltransferase 2                                              | Fatty acid $\beta$ oxidation                                           | 3.0          | 3.0         |
| Q62651           | <i>Ech1</i>    | $\Delta(3,5)$ - $\Delta(2,4)$ -dienoyl-CoA isomerase                                    | Lipid metabolism, fatty acid $\beta$ oxidation                         | NS           | 6.2 *       |
| Q68G41           | <i>Eci1</i>    | Dodecenoyl-Coenzyme A $\delta$ isomerase (3,2 <i>trans</i> -enoyl-Coenzyme A isomerase) | Fatty acid $\beta$ oxidation                                           | NS           | 2.1 *       |
| P13803           | <i>Etfa</i>    | Electron transfer flavoprotein subunit $\alpha$                                         | Lipid metabolism                                                       | 4.04         | 3.76        |
| Q68FU3           | <i>Etfb</i>    | Electron transfer flavoprotein subunit $\beta$                                          | Lipid metabolism                                                       | 2.30         | 2.72        |
| Q5XIC0           | <i>Eci2</i>    | Enoyl-CoA $\delta$ isomerase 2                                                          | Fatty acid $\beta$ oxidation                                           | 3.7          | 6.0         |
| P14604           | <i>Echs1</i>   | Enoyl-CoA hydratase                                                                     | Fatty acid $\beta$ oxidation                                           | NS           | 6.4 *       |
| P07483           | <i>Fabp3</i>   | Fatty acid-binding protein                                                              | Long chain fatty acid transport, fatty acid $\beta$ oxidation          | NS           | 49 *        |
| Q9WVK7           | <i>Hadh</i>    | Hydroxyacyl-coenzyme A dehydrogenase                                                    | Lipid metabolism; fatty acid $\beta$ -oxidation                        | NS           | 22 *        |
| P15650           | <i>Acadl</i>   | Long-chain specific acyl-CoA dehydrogenase                                              | Fatty acid $\beta$ oxidation                                           | 2.2          | 5.0 *       |
| P14882           | <i>Pcca</i>    | Propionyl-CoA carboxylase $\alpha$ chain                                                | Lipid metabolism                                                       | 5.2          | 5.2         |
| Q68FZ8           | <i>Pccb</i>    | Propionyl coenzyme A carboxylase, $\beta$ polypeptide                                   | Lipid metabolism                                                       | 2.8          | 4.5         |
| M0R7V3           | <i>Apoa</i>    | Protein Apoa                                                                            | Lipid transport                                                        | -1.4         | -3.1        |

Comparison among groups was performed as described in statistical analysis. FC = fold change with respect to sham group; NS = not significantly different from sham group; \* *p* vs. IR-LT3S < 0.017.

**Table S5.** Differentially expressed proteins involved in various metabolic process and energy homeostasis.

| Accession Number                                           | Gene Name     | Protein Name                                     | Function, Pathway                                                | IR-LT3S (FC) | IR-NT3 (FC) |
|------------------------------------------------------------|---------------|--------------------------------------------------|------------------------------------------------------------------|--------------|-------------|
| <i>Carbohydrate, amino acid and keton body metabolism:</i> |               |                                                  |                                                                  |              |             |
| P42123                                                     | <i>Ldhb</i>   | L-lactate dehydrogenase B chain                  | Glycolysis, lactate clearance                                    | NS           | 35 *        |
| M0R4B8                                                     | <i>N/A</i>    | Pyruvate kinase                                  | Glycolysis                                                       | 2.4          | 30 *        |
| P16617                                                     | <i>Pgk1</i>   | Phosphoglycerate kinase 1                        | Glycolysis                                                       | 3.8          | 22 *        |
| G3V6Y6                                                     | <i>Pygb</i>   | Glycogen phosphorylase                           | Carbohydrate metabolism                                          | 12           | 40 *        |
| B2GV15                                                     | <i>Dbt</i>    | Dihydrolipoamide branched chain transacylase E2  | Amino acid catabolic process                                     | 6.7          | 5.5         |
| B1WBN3                                                     | <i>Bckdha</i> | 2-oxoisovalerate dehydrogenase subunit $\alpha$  | Amino acid catabolic process                                     | 5.8          | 5.6         |
| P29266                                                     | <i>Hibadh</i> | 3-hydroxyisobutyrate dehydrogenase               | Amino acid degradation                                           | 3.2          | 6.3 *       |
| P12007                                                     | <i>Ivd</i>    | Isovaleryl-CoA dehydrogenase                     | Amino acid degradation                                           | 3.0          | 7.3 *       |
| Q5XIT9                                                     | <i>Mccc2</i>  | Methylcrotonoyl-CoA carboxylase $\beta$ chain    | Amino acid degradation                                           | 3.4          | 4.5         |
| F1LP30                                                     | <i>Mccc1</i>  | Methylcrotonoyl-CoA carboxylase subunit $\alpha$ | Amino acid degradation                                           | 9.7          | 7.9         |
| F1LQZ0                                                     | <i>Tmem65</i> | Protein Tmem65                                   | Amino acid catabolic process                                     | 3.2          | 2.1         |
| B2GV06                                                     | <i>Oxct1</i>  | Succinyl-CoA:3-ketoacid coenzyme A transferase 1 | Keton body catabolism                                            | NS           | 4.9 *       |
| P17764                                                     | <i>Acat1</i>  | Acetyl-CoA acetyltransferase                     | Ketone body metabolism, lipid metabolism                         | -1.9         | 1.6 *       |
| <i>Energy homeostasis:</i>                                 |               |                                                  |                                                                  |              |             |
| Q9WUS0                                                     | <i>Ak4</i>    | Adenylate kinase 4                               | Homeostasis of cellular nucleotides, cellular energy homeostasis | 1.9          | 2.3         |
| M0RC66                                                     | <i>Ak1</i>    | Adenylate kinase isoenzyme 1 (Fragment)          | Homeostasis of cellular nucleotides, cellular energy homeostasis | 27           | 50          |
| P09605                                                     | <i>Ckmt2</i>  | Creatine kinase S-type                           | Energy transduction in tissues with large, fluctuating energy    | -6.1         | -2.7 *      |

Comparison among groups was performed as described in statistical analysis. FC = fold change with respect to sham group; NS = not significantly different from sham group; \*  $p$  vs. IR-LT3S < 0.017.
